# Supplementary material
Source: Springer Nature journal article supplement (https://www.springermedizin.de/resource/supplementary/12889_2011_4046_MOESM1_ESM.pdf/9491386)
Supplement: MOESM1 [file 9491386]

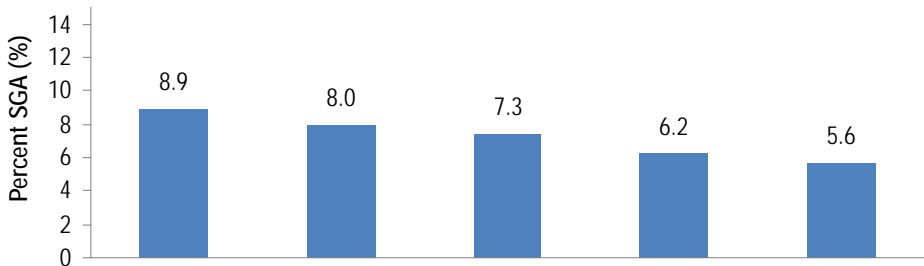

Income quintile 1 (\$6196 - \$24,444)    Income quintile 2 (\$24,445 - \$28,440)    Income quintile 3 (\$28,441 - \$32,954)    Income quintile 4 (\$32,987 - \$38,832)    Income quintile 5 (\$38,838 - \$509,269)

**Area-level average income range by quintile**
